# Supplementary material for: Morphological Variations between Korean and Southwestern Japanese Lilium leichtlinii Hook. f
Source: MDPI journal article supplement (doi:10.3390/plants11152016), 2022-08-02
Supplement: s1 [file s1]

**Supplementary Table S1.** Matrix of coefficient vectors and variance proportion from the first three principal component axes based on 36 morphological traits of 59 *L. leichtlinii* accessions (30 KR and 29 JSW).

| No            | Trait*           | Component and loading value |               |                | Uniqueness |
|---------------|------------------|-----------------------------|---------------|----------------|------------|
|               |                  | 1                           | 2             | 3              |            |
| 1             | 3LL              | <b>0.8381</b>               | 0.1947        | 0.25758        | 0.193      |
| 2             | 2LL              | <b>0.8326</b>               | 0.1972        | 0.23716        | 0.212      |
| 3             | 1LW              | <b>0.8095</b>               | 0.2510        | 0.00875        | 0.282      |
| 4             | 1LL              | <b>0.7760</b>               | 0.2588        | 0.24302        | 0.272      |
| 5             | 4LL              | <b>0.7741</b>               | -0.0175       | 0.27212        | 0.326      |
| 6             | 3LW              | <b>0.7730</b>               | 0.3418        | 0.15449        | 0.262      |
| 7             | 2LW              | <b>0.7603</b>               | 0.3434        | 0.10012        | 0.294      |
| 8             | 5LL              | <b>0.7272</b>               | -0.0258       | 0.28183        | 0.391      |
| 9             | 4LW              | <b>0.7037</b>               | 0.4147        | 0.19659        | 0.294      |
| 10            | 5LW              | <b>0.6780</b>               | 0.4316        | 0.25778        | 0.287      |
| 11            | LOB              | 0.6709                      | -0.0823       | 0.26730        | 0.472      |
| 12            | WOB              | 0.6062                      | -0.4061       | -0.13011       | 0.451      |
| 13            | DOP              | 0.5134                      | -0.2341       | -0.26229       | 0.613      |
| 14            | LOBl             | 0.4804                      | 0.4103        | 0.44514        | 0.403      |
| 15            | LIFr             | 0.4363                      | 0.2119        | 0.24370        | 0.705      |
| 16            | LOT              | 0.1722                      | <b>0.8721</b> | 0.22751        | 0.158      |
| 17            | LIT              | 0.2026                      | <b>0.8707</b> | 0.22509        | 0.150      |
| 18            | DOS <sub>t</sub> | 0.0739                      | <b>0.8345</b> | 0.28196        | 0.219      |
| 19            | LOF              | -0.0961                     | <b>0.7216</b> | 0.32563        | 0.364      |
| 20            | WOT              | 0.1351                      | 0.6616        | -0.16343       | 0.517      |
| 21            | WIT              | 0.2964                      | 0.6440        | 0.13444        | 0.479      |
| 22            | LOPI             | 0.1952                      | 0.6186        | 0.43110        | 0.393      |
| 23            | LOA              | 0.1522                      | -0.5998       | -0.21583       | 0.571      |
| 24            | MLW              | 0.0624                      | 0.4810        | 0.47575        | 0.538      |
| 25            | LOO              | 0.4004                      | 0.4705        | 0.29697        | 0.530      |
| 26            | LON              | 0.3705                      | 0.4376        | 0.36736        | 0.536      |
| 27            | NL               | -0.1059                     | -0.2560       | 0.01765        | 0.923      |
| 28            | NOP              | -0.1779                     | -0.2506       | 0.24026        | 0.848      |
| 29            | LT1F             | 0.2085                      | 0.0525        | <b>0.91692</b> | 0.113      |
| 30            | LTLL             | 0.2103                      | 0.0221        | <b>0.90631</b> | 0.134      |
| 31            | PLH              | 0.3415                      | 0.1203        | <b>0.85983</b> | 0.130      |
| 32            | LIN              | 0.1379                      | 0.1772        | <b>0.82674</b> | 0.266      |
| 33            | MLL              | 0.2734                      | 0.2096        | <b>0.74792</b> | 0.322      |
| 34            | NOBl             | -0.2257                     | -0.3287       | -0.55356       | 0.535      |
| 35            | LPED             | 0.0776                      | 0.3594        | 0.54578        | 0.567      |
| 36            | LOP              | 0.2035                      | 0.3374        | 0.45178        | 0.641      |
| Eigenvalue    |                  | 13.92                       | 4.62          | 3.06           |            |
| % of variance |                  | 23.4                        | 18.9          | 17.8           |            |
| Cumulative %  |                  | 23.4                        | 42.2          | 60.0           |            |

Note. Varimax rotation was used. \*Abbreviations are shown in Table 2.
